# Supplementary material for: The advantages of the Matthews correlation coefficient (MCC) over F1 score and accuracy in binary classification evaluation
Source: Springer Nature journal article supplement (doi:10.1186/s12864-019-6413-7), 2020-01-02

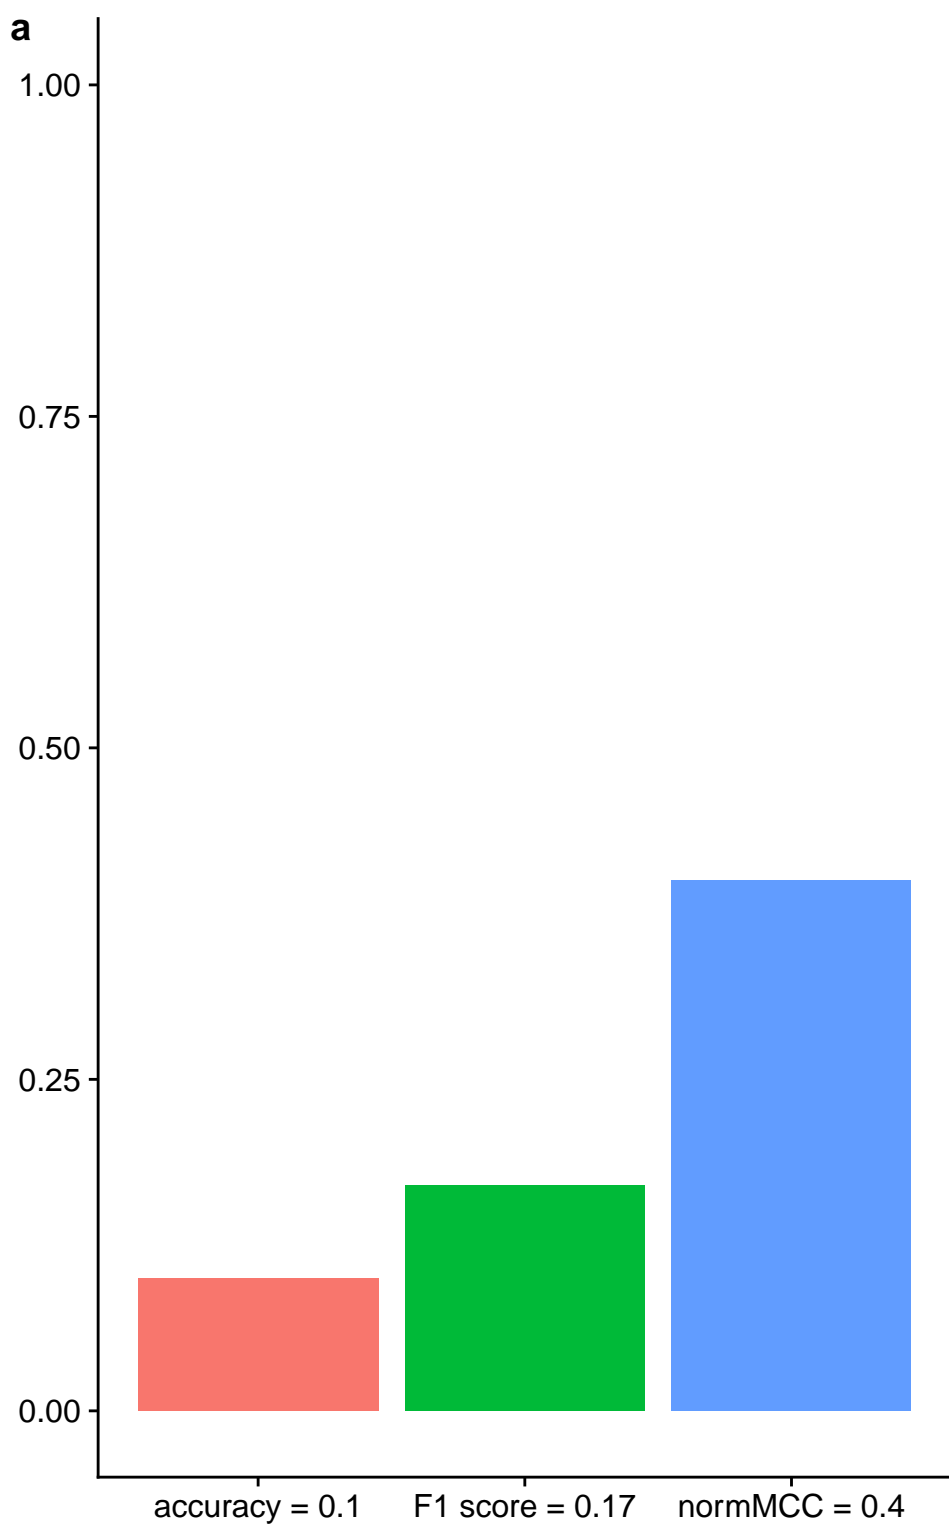

accuracy = 0.1  
F1 score = 0.17  
normMCC = 0.4

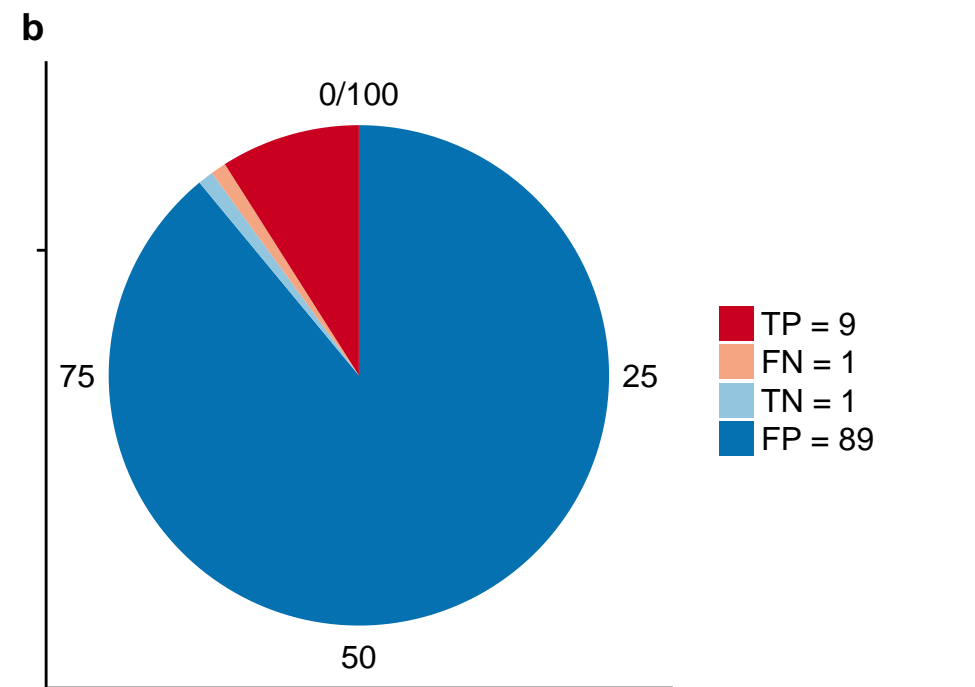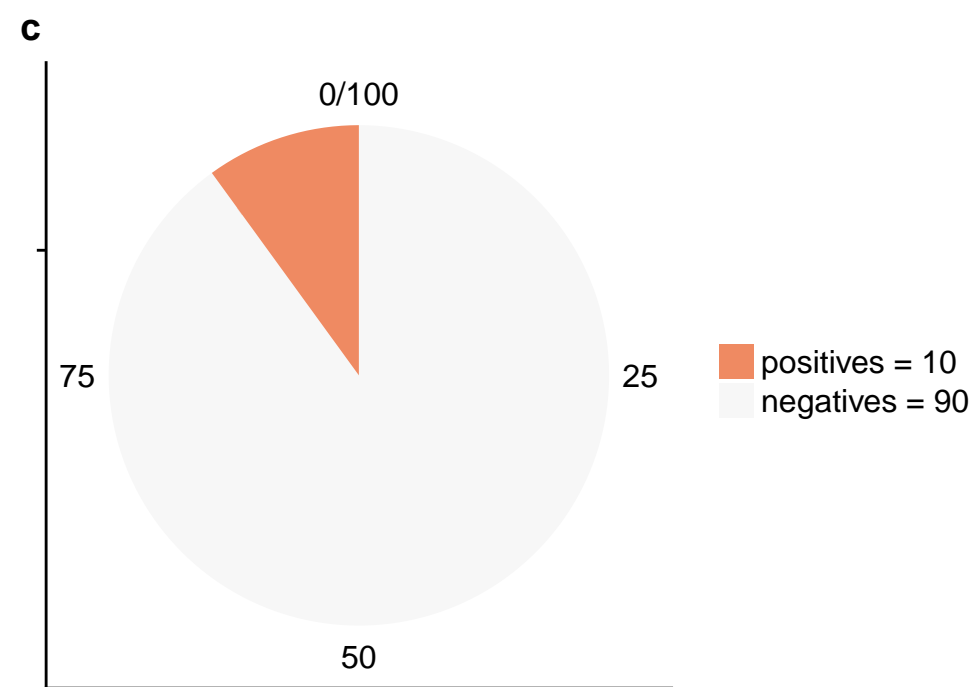

Supplement: 12864_2019_6413_MOESM4_ESM.pdf [file 12864_2019_6413_MOESM4_ESM.pdf]
